# Supplementary material for: Heterologous biosynthesis of a fungal macrocyclic polylactone requires only two iterative polyketide synthases
Source: Royal Society of Chemistry journal article supplement (doi:10.1039/c8ob02773k), 2018-12-11
Supplement: c8ob02773k2.xlsx [file c8ob02773k2.xlsx]

## Sheet: Supplementary 2
query.acc.ver	FMSM_FPKM	PDB_FPKM	Nr	Nt	Swissprot	KEGG	COG	Interpro	GO
Unigene363_All	51.63	21.38	gi|242826759|ref|XP_002488697.1|/0/polyketide synthase, putative [Talaromyces stipitatus ATCC 10500] &gt;gi|218712089|gb|EED11516.1| polyketide synthase, putative [Talaromyces stipitatus ATCC 10500]	gi|628271720|ref|XM_007732845.1|/7e-13/Capronia epimyces CBS 606.96 acetyltransferase partial mRNA	sp|Q03149|WA_EMENI/0.0/Conidial yellow pigment biosynthesis polyketide synthase OS=Emericella nidulans (strain FGSC A4 / ATCC 38163 / CBS 112.46 / NRRL 194 / M139) GN=wA PE=1 SV=2	mbe:MBM_00260/0.0/polyketide synthase 1; K19791 iron transport multicopper oxidase	all1648_1/3e-131/---	PS50075/15.781/Acyl carrier protein phosphopantetheine domain profile.	biological_process:GO:0009058//biosynthetic process;molecular_function:GO:0047879//erythronolide synthase activity;GO:0031177//phosphopantetheine binding;GO:0016788//hydrolase activity, acting on ester bonds;
CL2915.Contig4_All	44.55	27.25	gi|242826754|ref|XP_002488696.1|/0/polyketide synthase, putative [Talaromyces stipitatus ATCC 10500] &gt;gi|218712088|gb|EED11515.1| polyketide synthase, putative [Talaromyces stipitatus ATCC 10500]	gi|822490368|gb|CP010928.1|/7e-13/Sporisorium scitamineum strain SSC39 chromosome 16, complete sequence	sp|Q0C8M3|LNKS_ASPTN/2e-94/Lovastatin nonaketide synthase OS=Aspergillus terreus (strain NIH 2624 / FGSC A1156) GN=lovB PE=3 SV=2	pcs:Pc21g12440/4e-156/Pc21g12440; K15418 zearalenone synthase, highly reducing iterative type I polyketide synthase	SMc02273/4e-64/---	PTHR11712:SF225/0.0/--	molecular_function:GO:0016740//transferase activity;
CL2915.Contig7_All	42.15	28.3	gi|242826754|ref|XP_002488696.1|/0/polyketide synthase, putative [Talaromyces stipitatus ATCC 10500] &gt;gi|218712088|gb|EED11515.1| polyketide synthase, putative [Talaromyces stipitatus ATCC 10500]	gi|953398245|ref|XM_014687879.1|/4e-08/Metarhizium brunneum ARSEF 3297 Beta-ketoacyl synthase partial mRNA	sp|Q9Y8A5|LNKS_ASPTE/0.0/Lovastatin nonaketide synthase OS=Aspergillus terreus GN=lovB PE=1 SV=1	bfu:BC1G_09042/0.0/similar to polyketide synthase; K15419 emericellamide biosynthesis, highly reducing iterative type I polyketide synthase	ML2354/6e-115/---	PF00107/6.3E-11/Zinc-binding dehydrogenase	biological_process:GO:0008152//metabolic process;molecular_function:GO:0016746//transferase activity, transferring acyl groups;
Unigene6408_All	18.48	14.2	gi|29027893|gb|AAO62426.1|/0/type I polyketide synthase [Phoma sp. C2932]	gi|211588786|emb|AM920436.1|/2e-10/Penicillium chrysogenum Wisconsin 54-1255 complete genome, contig Pc00c21	sp|Q0C8M3|LNKS_ASPTN/0.0/Lovastatin nonaketide synthase OS=Aspergillus terreus (strain NIH 2624 / FGSC A1156) GN=lovB PE=3 SV=2	bfu:BC1G_09042/0.0/similar to polyketide synthase; K15419 emericellamide biosynthesis, highly reducing iterative type I polyketide synthase	CAC3355/4e-166/---	SM00823/7.3E-6/Phosphopantetheine attachment site	NA
CL4699.Contig3_All	18.32	8.06	gi|525582730|gb|EPS28980.1|/0/hypothetical protein PDE_03926 [Penicillium oxalicum 114-2]	gi|758997887|ref|XM_955347.3|/3e-81/Neurospora crassa OR74A DUF21 and CBS domain-containing protein mRNA	sp|Q0C8M3|LNKS_ASPTN/5e-130/Lovastatin nonaketide synthase OS=Aspergillus terreus (strain NIH 2624 / FGSC A1156) GN=lovB PE=3 SV=2	bfu:BC1G_09042/0.0/similar to polyketide synthase; K15419 emericellamide biosynthesis, highly reducing iterative type I polyketide synthase	YOL060c_1/2e-122/---	PF00550/3.2E-7/Phosphopantetheine attachment site	molecular_function:GO:0003824//catalytic activity;
CL4817.Contig1_All	14.63	4.4	gi|972146903|gb|KUI73152.1|/0/Lovastatin diketide synthase LovF [Valsa mali]	gi|930141935|ref|XM_014315899.1|/8e-07/Grosmannia clavigera kw1407 polyketide synthase partial mRNA	sp|Q0C8M3|LNKS_ASPTN/2e-160/Lovastatin nonaketide synthase OS=Aspergillus terreus (strain NIH 2624 / FGSC A1156) GN=lovB PE=3 SV=2	pcs:Pc21g12440/0.0/Pc21g12440; K15418 zearalenone synthase, highly reducing iterative type I polyketide synthase	CAC3355/1e-157/---	SM00826/2.9E-9/--	NA
Unigene80_All	5.1	2.27	gi|972538465|gb|KUJ15091.1|/0/reducing type I polyketide synthase [Phialocephala scopiformis]	NA	sp|Q0C8M3|LNKS_ASPTN/1e-32/Lovastatin nonaketide synthase OS=Aspergillus terreus (strain NIH 2624 / FGSC A1156) GN=lovB PE=3 SV=2	pcs:Pc21g12440/3e-138/Pc21g12440; K15418 zearalenone synthase, highly reducing iterative type I polyketide synthase	SMc02273/1e-82/---	PF00550/1.7E-7/Phosphopantetheine attachment site	biological_process:GO:0044763//single-organism cellular process;GO:0044550//secondary metabolite biosynthetic process;GO:1901362//organic cyclic compound biosynthetic process;GO:0044249//cellular biosynthetic process;molecular_function:GO:0003824//catalytic activity;
Unigene5941_All	5.1	0.59	gi|751746610|gb|KIM94801.1|/0/hypothetical protein OIDMADRAFT_172503 [Oidiodendron maius Zn]	NA	sp|Q0C8M3|LNKS_ASPTN/6e-136/Lovastatin nonaketide synthase OS=Aspergillus terreus (strain NIH 2624 / FGSC A1156) GN=lovB PE=3 SV=2	bfu:BC1G_09042/0.0/similar to polyketide synthase; K15419 emericellamide biosynthesis, highly reducing iterative type I polyketide synthase	CAC3355/2e-94/---	PF00550/1.1E-9/Phosphopantetheine attachment site	molecular_function:GO:0016740//transferase activity;
CL4817.Contig2_All	4.13	2.61	gi|972146903|gb|KUI73152.1|/0/Lovastatin diketide synthase LovF [Valsa mali]	gi|930141935|ref|XM_014315899.1|/8e-07/Grosmannia clavigera kw1407 polyketide synthase partial mRNA	sp|Q0C8M3|LNKS_ASPTN/2e-160/Lovastatin nonaketide synthase OS=Aspergillus terreus (strain NIH 2624 / FGSC A1156) GN=lovB PE=3 SV=2	pcs:Pc21g12440/0.0/Pc21g12440; K15418 zearalenone synthase, highly reducing iterative type I polyketide synthase	CAC3355/1e-157/---	SM00826/2.9E-9/--	NA
Unigene489_All	3.82	0.51	gi|685408935|ref|XP_009223326.1|/4.606e-96/hypothetical protein GGTG_07238 [Gaeumannomyces graminis var. tritici R3-111a-1] &gt;gi|402082181|gb|EJT77326.1| hypothetical protein GGTG_07238 [Gaeumannomyces graminis var. tritici R3-111a-1]	gi|389626246|ref|XM_003710729.1|/2e-15/Magnaporthe oryzae 70-15 fatty acid synthase S-acetyltransferase (MGG_04775) mRNA, complete cds	sp|Q4WAZ9|NRP14_ASPFU/1e-25/Nonribosomal peptide synthetase 14 OS=Neosartorya fumigata (strain ATCC MYA-4609 / Af293 / CBS 101355 / FGSC A1100) GN=NRPS14 PE=2 SV=2	pcs:Pc21g12440/2e-44/Pc21g12440; K15418 zearalenone synthase, highly reducing iterative type I polyketide synthase	all1649/8e-20/---	PTHR11712/5.1E-124/--	biological_process:GO:0008152//metabolic process;molecular_function:GO:0003824//catalytic activity;
Unigene5245_All	3.8	2.23	gi|584141499|gb|EWG50830.1|/0/hypothetical protein FVEG_16698 [Fusarium verticillioides 7600]	gi|930136983|ref|XM_014313423.1|/2e-07/Grosmannia clavigera kw1407 polyketide synthase partial mRNA	sp|Q4WAZ9|NRP14_ASPFU/3e-43/Nonribosomal peptide synthetase 14 OS=Neosartorya fumigata (strain ATCC MYA-4609 / Af293 / CBS 101355 / FGSC A1100) GN=NRPS14 PE=2 SV=2	pcs:Pc21g12440/9e-138/Pc21g12440; K15418 zearalenone synthase, highly reducing iterative type I polyketide synthase	SMc02273/6e-75/---	SM00829/7.8E-130/Enoylreductase	NA
Unigene737_All	2.91	1.87	gi|666870479|gb|KEZ46536.1|/4.02645e-137/Uncharacterized protein SAPIO_CDS0328 [Scedosporium apiospermum]	gi|768311757|gb|CP010985.1|/2e-06/Verticillium dahliae VdLs.17 chromosome 6, complete sequence	sp|Q0C8M3|LNKS_ASPTN/3e-39/Lovastatin nonaketide synthase OS=Aspergillus terreus (strain NIH 2624 / FGSC A1156) GN=lovB PE=3 SV=2	pcs:Pc21g12440/1e-54/Pc21g12440; K15418 zearalenone synthase, highly reducing iterative type I polyketide synthase	SMc02273/2e-32/---	SM00822/5.1E-27/--	NA
Unigene7077_All	2.64	2.09	gi|996587892|gb|KXH31892.1|/1.88433e-123/beta-ketoacyl synthase domain-containing protein [Colletotrichum simmondsii]	gi|259486486|tpe|BN001307.1|/9e-06/TPA_asm: Aspergillus nidulans FGSC A4 chromosome VII	sp|Q4WAZ9|NRP14_ASPFU/2e-34/Nonribosomal peptide synthetase 14 OS=Neosartorya fumigata (strain ATCC MYA-4609 / Af293 / CBS 101355 / FGSC A1100) GN=NRPS14 PE=2 SV=2	pcs:Pc21g12440/1e-49/Pc21g12440; K15418 zearalenone synthase, highly reducing iterative type I polyketide synthase	ML2355/3e-39/---	PTHR11712:SF224/2.0E-156/--	NA
Unigene14918_All	2.49	0.46	gi|596666764|ref|XP_007276170.1|/0/polyketide synthase [Colletotrichum gloeosporioides Nara gc5] &gt;gi|429859961|gb|ELA34716.1| polyketide synthase [Colletotrichum gloeosporioides Nara gc5]	gi|596666763|ref|XM_007276108.1|/9e-15/Colletotrichum gloeosporioides Nara gc5 polyketide synthase (CGGC5_5409), partial mRNA	sp|Q4WAZ9|NRP14_ASPFU/3e-33/Nonribosomal peptide synthetase 14 OS=Neosartorya fumigata (strain ATCC MYA-4609 / Af293 / CBS 101355 / FGSC A1100) GN=NRPS14 PE=2 SV=2	pcs:Pc21g12440/3e-43/Pc21g12440; K15418 zearalenone synthase, highly reducing iterative type I polyketide synthase	SMc02273/2e-31/---	PTHR11712:SF224/9.3E-138/--	biological_process:GO:0055114//oxidation-reduction process;molecular_function:GO:0031177//phosphopantetheine binding;GO:0008270//zinc ion binding;GO:0016740//transferase activity;GO:0016491//oxidoreductase activity;
Unigene22002_All	2.21	0.22	gi|827061317|ref|XP_008092236.1|/3.61132e-57/beta-ketoacyl synthase domain-containing protein [Colletotrichum graminicola M1.001] &gt;gi|310792755|gb|EFQ28216.1| beta-ketoacyl synthase domain-containing protein [Colletotrichum graminicola M1.001]	NA	sp|Q0CGY7|SEC16_ASPTN/3e-06/COPII coat assembly protein sec16 OS=Aspergillus terreus (strain NIH 2624 / FGSC A1156) GN=sec16 PE=3 SV=1	pcs:Pc21g12440/4e-20/Pc21g12440; K15418 zearalenone synthase, highly reducing iterative type I polyketide synthase	Rv1912c/1e-08/---	PTHR11712/5.9E-55/--	NA
Unigene6054_All	1.92	0.99	gi|949391213|dbj|GAP85770.1|/1.50941e-116/putative polyketide [Rosellinia necatrix]	NA	sp|P22367|MSAS_PENPA/7e-48/6-methylsalicylic acid synthase OS=Penicillium patulum PE=1 SV=1	pcs:Pc21g12440/8e-62/Pc21g12440; K15418 zearalenone synthase, highly reducing iterative type I polyketide synthase	MT1704/2e-50/---	PF02801/5.5E-36/Beta-ketoacyl synthase, C-terminal domain	molecular_function:GO:0003824//catalytic activity;
Unigene5193_All	1.9	1.84	gi|953381395|ref|XP_014534966.1|/1.41604e-122/hypothetical protein PDIP_46770 [Penicillium digitatum Pd1] &gt;gi|425768332|gb|EKV06858.1| hypothetical protein PDIG_76310 [Penicillium digitatum PHI26] &gt;gi|425775562|gb|EKV13822.1| hypothetical protein PDIP_46770 [Penicillium digitatum Pd1]	NA	sp|Q4WAZ9|NRP14_ASPFU/3e-38/Nonribosomal peptide synthetase 14 OS=Neosartorya fumigata (strain ATCC MYA-4609 / Af293 / CBS 101355 / FGSC A1100) GN=NRPS14 PE=2 SV=2	pcs:Pc21g12440/3e-55/Pc21g12440; K15418 zearalenone synthase, highly reducing iterative type I polyketide synthase	SMc02273/1e-33/---	PTHR11712:SF225/7.2E-145/--	biological_process:GO:0008152//metabolic process;molecular_function:GO:0003824//catalytic activity;
Unigene9002_All	1.66	0.91	gi|666870479|gb|KEZ46536.1|/4.27284e-162/Uncharacterized protein SAPIO_CDS0328 [Scedosporium apiospermum]	gi|389645009|ref|XM_003720089.1|/3e-42/Magnaporthe oryzae 70-15 polyketide synthase (MGG_14945) mRNA, complete cds	sp|P08640|MUC1_YEAST/9e-16/Flocculation protein FLO11 OS=Saccharomyces cerevisiae (strain ATCC 204508 / S288c) GN=MUC1 PE=1 SV=2	pcs:Pc21g12440/8e-34/Pc21g12440; K15418 zearalenone synthase, highly reducing iterative type I polyketide synthase	Rv1527c/4e-15/---	PF08240/1.2E-8/Alcohol dehydrogenase GroES-like domain	molecular_function:GO:0003824//catalytic activity;
Unigene17099_All	1.63	0	gi|631232935|ref|XP_007911390.1|/7.78055e-60/putative polyketide synthase protein [Phaeoacremonium minimum UCRPA7] &gt;gi|500261601|gb|EOO03974.1| putative polyketide synthase protein [Phaeoacremonium minimum UCRPA7]	gi|667644994|ref|XM_008596107.1|/1e-14/Beauveria bassiana ARSEF 2860 lovastatin nonaketide synthase partial mRNA	sp|Q0C8M3|LNKS_ASPTN/3e-11/Lovastatin nonaketide synthase OS=Aspergillus terreus (strain NIH 2624 / FGSC A1156) GN=lovB PE=3 SV=2	pcs:Pc21g12440/2e-16/Pc21g12440; K15418 zearalenone synthase, highly reducing iterative type I polyketide synthase	Rv1181/7e-13/---	PTHR11712:SF216/4.0E-65/--	biological_process:GO:0055114//oxidation-reduction process;molecular_function:GO:0031177//phosphopantetheine binding;GO:0008270//zinc ion binding;GO:0016740//transferase activity;GO:0016491//oxidoreductase activity;
Unigene2482_All	1.61	0	gi|629648406|ref|XP_007790688.1|/5.81056e-28/putative polyketide synthase protein [Eutypa lata UCREL1] &gt;gi|471571424|gb|EMR70211.1| putative polyketide synthase protein [Eutypa lata UCREL1]	NA	NA	pcs:Pc21g12440/3e-11/Pc21g12440; K15418 zearalenone synthase, highly reducing iterative type I polyketide synthase	Rv1181/6e-06/---	PTHR11712:SF225/2.4E-19/--	molecular_function:GO:0003824//catalytic activity;
Unigene19557_All	1.61	0.2	gi|924824292|gb|KOS22233.1|/9.0125e-65/Lovastatin nonaketide synthase [Escovopsis weberi]	gi|915031397|ref|XM_013411454.1|/3e-09/Rhinocladiella mackenziei CBS 650.93 hypothetical protein partial mRNA	NA	pcs:Pc21g12440/7e-37/Pc21g12440; K15418 zearalenone synthase, highly reducing iterative type I polyketide synthase	Rv1527c/1e-22/---	PTHR11712/7.0E-68/--	biological_process:GO:0008152//metabolic process;molecular_function:GO:0003824//catalytic activity;
Unigene17406_All	1.61	0.17	gi|957801312|gb|ALQ32955.1|/5.07045e-88/putative polyketide synthase [Fusarium equiseti]	gi|957801311|gb|KU180092.1|/6e-08/Fusarium equiseti strain NRRL 06979 putative polyketide synthase (Fsc_106) mRNA, complete cds	sp|Q9Y8A5|LNKS_ASPTE/1e-47/Lovastatin nonaketide synthase OS=Aspergillus terreus GN=lovB PE=1 SV=1	bfu:BC1G_09042/7e-48/similar to polyketide synthase; K15419 emericellamide biosynthesis, highly reducing iterative type I polyketide synthase	ML2354/4e-42/---	PF00109/1.0E-56/Beta-ketoacyl synthase, N-terminal domain	biological_process:GO:0055114//oxidation-reduction process;molecular_function:GO:0050637//lovastatin nonaketide synthase activity;GO:0031177//phosphopantetheine binding;GO:0016491//oxidoreductase activity;
Unigene20846_All	1.6	0	gi|477530347|gb|ENH82089.1|/3.67876e-39/polyketide synthase [Colletotrichum orbiculare MAFF 240422]	gi|398398650|ref|XM_003852735.1|/6e-07/Mycosphaerella graminicola IPO323 polyketide synthase (PKS3) mRNA, complete cds	sp|Q9Y8A5|LNKS_ASPTE/3e-07/Lovastatin nonaketide synthase OS=Aspergillus terreus GN=lovB PE=1 SV=1	pcs:Pc21g12440/2e-14/Pc21g12440; K15418 zearalenone synthase, highly reducing iterative type I polyketide synthase	SMc02273/2e-12/---	PTHR11712/6.8E-45/--	molecular_function:GO:0003824//catalytic activity;
Unigene1200_All	1.58	0.93	gi|751746294|gb|KIM94486.1|/4.73121e-121/hypothetical protein OIDMADRAFT_106798 [Oidiodendron maius Zn]	gi|222090394|gb|EU980390.1|/5e-21/Chaetomium chiversii strain CS-36-62 radicicol biosynthetic gene locus, complete sequence	sp|Q9Y8A5|LNKS_ASPTE/3e-26/Lovastatin nonaketide synthase OS=Aspergillus terreus GN=lovB PE=1 SV=1	pcs:Pc21g12440/7e-86/Pc21g12440; K15418 zearalenone synthase, highly reducing iterative type I polyketide synthase	CAC3355/1e-15/---	PS50075/12.109/Acyl carrier protein phosphopantetheine domain profile.	NA
CL2473.Contig5_All	1.53	0.5	gi|682377952|gb|KFY61906.1|/0/hypothetical protein V496_04806 [Pseudogymnoascus sp. VKM F-4515 (FW-2607)] &gt;gi|682398443|gb|KFY75876.1| hypothetical protein V498_09868 [Pseudogymnoascus sp. VKM F-4517 (FW-2822)]	gi|223886890|gb|FJ232773.1|/2e-07/Uncultured fungus clone RNATypeUS4 type I polyketide synthase mRNA, partial cds	sp|Q0C8M3|LNKS_ASPTN/3e-177/Lovastatin nonaketide synthase OS=Aspergillus terreus (strain NIH 2624 / FGSC A1156) GN=lovB PE=3 SV=2	bfu:BC1G_09042/0.0/similar to polyketide synthase; K15419 emericellamide biosynthesis, highly reducing iterative type I polyketide synthase	CAC3355/2e-131/---	PF14765/6.5E-47/Polyketide synthase dehydratase	biological_process:GO:0008152//metabolic process;molecular_function:GO:0003824//catalytic activity;
Unigene6341_All	1.5	1.43	gi|440472345|gb|ELQ41210.1|/3.30142e-39/fatty acid synthase S-acetyltransferase [Magnaporthe oryzae Y34] &gt;gi|440489360|gb|ELQ69018.1| fatty acid synthase S-acetyltransferase [Magnaporthe oryzae P131]	gi|629651205|ref|XM_007793249.1|/2e-10/Eutypa lata UCREL1 putative polyketide synthase protein mRNA	sp|Q4WAZ9|NRP14_ASPFU/3e-08/Nonribosomal peptide synthetase 14 OS=Neosartorya fumigata (strain ATCC MYA-4609 / Af293 / CBS 101355 / FGSC A1100) GN=NRPS14 PE=2 SV=2	pcs:Pc21g12440/3e-13/Pc21g12440; K15418 zearalenone synthase, highly reducing iterative type I polyketide synthase	NA	PTHR11712:SF225/2.2E-24/--	biological_process:GO:0008152//metabolic process;molecular_function:GO:0003824//catalytic activity;
Unigene1846_All	1.49	1.2	gi|666870479|gb|KEZ46536.1|/8.33923e-80/Uncharacterized protein SAPIO_CDS0328 [Scedosporium apiospermum]	gi|389645009|ref|XM_003720089.1|/5e-20/Magnaporthe oryzae 70-15 polyketide synthase (MGG_14945) mRNA, complete cds	sp|Q5A5M7|RBR3_CANAL/3e-07/Cell wall protein RBR3 OS=Candida albicans (strain SC5314 / ATCC MYA-2876) GN=RBR3 PE=1 SV=2	pcs:Pc21g12440/2e-34/Pc21g12440; K15418 zearalenone synthase, highly reducing iterative type I polyketide synthase	Rv1527c/1e-25/---	SM00829/1.5E-9/Enoylreductase	biological_process:GO:0055114//oxidation-reduction process;molecular_function:GO:0016740//transferase activity;GO:0016491//oxidoreductase activity;
Unigene19911_All	1.49	0.24	gi|596666764|ref|XP_007276170.1|/7.11584e-42/polyketide synthase [Colletotrichum gloeosporioides Nara gc5] &gt;gi|429859961|gb|ELA34716.1| polyketide synthase [Colletotrichum gloeosporioides Nara gc5]	NA	sp|Q4WAZ9|NRP14_ASPFU/2e-11/Nonribosomal peptide synthetase 14 OS=Neosartorya fumigata (strain ATCC MYA-4609 / Af293 / CBS 101355 / FGSC A1100) GN=NRPS14 PE=2 SV=2	bfu:BC1G_09042/7e-12/similar to polyketide synthase; K15419 emericellamide biosynthesis, highly reducing iterative type I polyketide synthase	NA	PTHR11712/8.5E-20/--	biological_process:GO:0055114//oxidation-reduction process;molecular_function:GO:0031177//phosphopantetheine binding;GO:0008270//zinc ion binding;GO:0016740//transferase activity;GO:0016491//oxidoreductase activity;
Unigene19446_All	1.28	0.12	gi|629648406|ref|XP_007790688.1|/2.87493e-94/putative polyketide synthase protein [Eutypa lata UCREL1] &gt;gi|471571424|gb|EMR70211.1| putative polyketide synthase protein [Eutypa lata UCREL1]	NA	NA	bfu:BC1G_09042/1e-31/similar to polyketide synthase; K15419 emericellamide biosynthesis, highly reducing iterative type I polyketide synthase	Rv1527c/2e-26/---	NA	molecular_function:GO:0003824//catalytic activity;
Unigene20998_All	1.26	0	gi|818162377|gb|KKP02310.1|/2.35662e-29/beta-ketoacyl synthase domain-containing protein [Trichoderma harzianum]	gi|70986359|ref|XM_743581.1|/5e-07/Aspergillus fumigatus Af293 PKS-like enzyme (AFUA_3G03540), partial mRNA	NA	pcs:Pc21g12440/1e-09/Pc21g12440; K15418 zearalenone synthase, highly reducing iterative type I polyketide synthase	NA	PTHR11712/2.5E-28/--	biological_process:GO:0055114//oxidation-reduction process;molecular_function:GO:0031177//phosphopantetheine binding;GO:0016740//transferase activity;GO:0016491//oxidoreductase activity;
Unigene17902_All	1.25	0	gi|679988462|gb|KFX41559.1|/7.94264e-17/Conidial yellow pigment biosynthesis polyketide synthase [Talaromyces marneffei PM1]	NA	NA	mbe:MBM_00260/3e-06/polyketide synthase 1; K19791 iron transport multicopper oxidase	NA	NA	NA
Unigene18177_All	1.24	0	gi|995937752|gb|KXG50430.1|/3.3014e-68/Acyl transferase/acyl hydrolase/lysophospholipase [Penicillium griseofulvum]	gi|589104890|ref|XM_006964406.1|/3e-06/Trichoderma reesei QM6a polyketide synthase (TRIREDRAFT_106272), partial mRNA	sp|Q4WAZ9|NRP14_ASPFU/3e-19/Nonribosomal peptide synthetase 14 OS=Neosartorya fumigata (strain ATCC MYA-4609 / Af293 / CBS 101355 / FGSC A1100) GN=NRPS14 PE=2 SV=2	pcs:Pc21g12440/1e-34/Pc21g12440; K15418 zearalenone synthase, highly reducing iterative type I polyketide synthase	MT2108_1/3e-24/---	PF08659/1.0E-47/KR domain	biological_process:GO:0008152//metabolic process;molecular_function:GO:0003824//catalytic activity;
Unigene16505_All	1.22	0.27	gi|957801072|gb|ALQ32835.1|/6.43043e-26/putative polyketide synthase [Fusarium euwallaceae]	NA	NA	pcs:Pc21g12440/4e-11/Pc21g12440; K15418 zearalenone synthase, highly reducing iterative type I polyketide synthase	CAC3355/2e-07/---	NA	NA
Unigene3577_All	1.2	1.15	gi|367037723|ref|XP_003649242.1|/4.17121e-34/polyketide synthase [Thielavia terrestris NRRL 8126] &gt;gi|346996503|gb|AEO62906.1| polyketide synthase [Thielavia terrestris NRRL 8126]	gi|367037722|ref|XM_003649194.1|/2e-30/Thielavia terrestris NRRL 8126 polyketide synthase (THITE_40673) mRNA, complete cds	sp|Q4WAZ9|NRP14_ASPFU/8e-10/Nonribosomal peptide synthetase 14 OS=Neosartorya fumigata (strain ATCC MYA-4609 / Af293 / CBS 101355 / FGSC A1100) GN=NRPS14 PE=2 SV=2	bfu:BC1G_09042/2e-09/similar to polyketide synthase; K15419 emericellamide biosynthesis, highly reducing iterative type I polyketide synthase	ML2355/2e-08/---	PTHR11712/3.0E-28/--	biological_process:GO:0055114//oxidation-reduction process;molecular_function:GO:0031177//phosphopantetheine binding;GO:0016740//transferase activity;GO:0016491//oxidoreductase activity;
Unigene22521_All	1.09	0.17	gi|367037723|ref|XP_003649242.1|/8.66101e-48/polyketide synthase [Thielavia terrestris NRRL 8126] &gt;gi|346996503|gb|AEO62906.1| polyketide synthase [Thielavia terrestris NRRL 8126]	gi|367037722|ref|XM_003649194.1|/2e-15/Thielavia terrestris NRRL 8126 polyketide synthase (THITE_40673) mRNA, complete cds	sp|O74489|QOR_SCHPO/8e-08/Probable quinone oxidoreductase OS=Schizosaccharomyces pombe (strain 972 / ATCC 24843) GN=zta1 PE=1 SV=2	pcs:Pc21g12440/9e-28/Pc21g12440; K15418 zearalenone synthase, highly reducing iterative type I polyketide synthase	SMc02273/1e-21/---	PF00107/1.7E-19/Zinc-binding dehydrogenase	biological_process:GO:0055114//oxidation-reduction process;molecular_function:GO:0031177//phosphopantetheine binding;GO:0016740//transferase activity;GO:0016491//oxidoreductase activity;
Unigene19767_All	0.97	0.15	gi|629655251|ref|XP_007792497.1|/2.28493e-24/putative polyketide synthase protein [Eutypa lata UCREL1] &gt;gi|471568897|gb|EMR68425.1| putative polyketide synthase protein [Eutypa lata UCREL1]	NA	NA	bfu:BC1G_09042/1e-06/similar to polyketide synthase; K15419 emericellamide biosynthesis, highly reducing iterative type I polyketide synthase	NA	NA	molecular_function:GO:0003824//catalytic activity;
Unigene21103_All	0.95	0	gi|631232935|ref|XP_007911390.1|/5.87721e-28/putative polyketide synthase protein [Phaeoacremonium minimum UCRPA7] &gt;gi|500261601|gb|EOO03974.1| putative polyketide synthase protein [Phaeoacremonium minimum UCRPA7]	NA	sp|P34055|INC11_HYPAT/5e-07/Protein indc11 OS=Hypocrea atroviridis GN=indc11 PE=2 SV=1	pcs:Pc21g12440/1e-17/Pc21g12440; K15418 zearalenone synthase, highly reducing iterative type I polyketide synthase	SMc02273/6e-17/---	PTHR11712/1.0E-37/--	biological_process:GO:0055114//oxidation-reduction process;molecular_function:GO:0031177//phosphopantetheine binding;GO:0008270//zinc ion binding;GO:0016740//transferase activity;GO:0016491//oxidoreductase activity;
Unigene5391_All	0.93	0.89	gi|949391213|dbj|GAP85770.1|/1.21698e-66/putative polyketide [Rosellinia necatrix]	NA	sp|Q0C8M3|LNKS_ASPTN/6e-36/Lovastatin nonaketide synthase OS=Aspergillus terreus (strain NIH 2624 / FGSC A1156) GN=lovB PE=3 SV=2	pcs:Pc21g12440/6e-37/Pc21g12440; K15418 zearalenone synthase, highly reducing iterative type I polyketide synthase	RSp0641_2/7e-34/---	PTHR11712/3.1E-62/--	biological_process:GO:1900554//asperfuranone biosynthetic process;GO:0045461//sterigmatocystin biosynthetic process;GO:0055114//oxidation-reduction process;GO:1902086//fumagillin biosynthetic process;GO:1900584//o-orsellinic acid biosynthetic process;GO:1900557//emericellamide biosynthetic process;GO:1900815//monodictyphenone biosynthetic process;molecular_function:GO:0031177//phosphopantetheine …
Unigene1477_All	0.74	0.71	gi|525582730|gb|EPS28980.1|/9.33678e-26/hypothetical protein PDE_03926 [Penicillium oxalicum 114-2]	NA	sp|Q4WAZ9|NRP14_ASPFU/1e-16/Nonribosomal peptide synthetase 14 OS=Neosartorya fumigata (strain ATCC MYA-4609 / Af293 / CBS 101355 / FGSC A1100) GN=NRPS14 PE=2 SV=2	pcs:Pc21g12440/2e-18/Pc21g12440; K15418 zearalenone synthase, highly reducing iterative type I polyketide synthase	RSp0641_2/1e-16/---	PTHR11712:SF214/9.6E-41/--	biological_process:GO:0055114//oxidation-reduction process;molecular_function:GO:0031177//phosphopantetheine binding;GO:0016746//transferase activity, transferring acyl groups;GO:0016491//oxidoreductase activity;
Unigene15182_All	0.68	0.22	gi|770305806|gb|KJK63614.1|/2.85717e-19/Beta-ketoacyl synthase N-terminal domain protein [Aspergillus parasiticus SU-1]	NA	sp|Q0C8M3|LNKS_ASPTN/2e-10/Lovastatin nonaketide synthase OS=Aspergillus terreus (strain NIH 2624 / FGSC A1156) GN=lovB PE=3 SV=2	pcs:Pc21g12440/6e-14/Pc21g12440; K15418 zearalenone synthase, highly reducing iterative type I polyketide synthase	CAC3355/8e-07/---	PTHR11712:SF225/5.3E-24/--	molecular_function:GO:0003824//catalytic activity;
CL1126.Contig7_All	0.67	0.39	gi|936414795|gb|KPM43172.1|/0/Lovastatin diketide synthase LovF [Neonectria ditissima]	gi|302660976|ref|XM_003022115.1|/3e-06/Trichophyton verrucosum HKI 0517 hybrid PKS-NRPS enzyme, putative, mRNA	sp|P22367|MSAS_PENPA/2e-48/6-methylsalicylic acid synthase OS=Penicillium patulum PE=1 SV=1	bfu:BC1G_09042/5e-116/similar to polyketide synthase; K15419 emericellamide biosynthesis, highly reducing iterative type I polyketide synthase	Rv1181/2e-56/---	PF00698/1.6E-20/Acyl transferase domain	NA
Unigene19122_All	0.51	0	gi|667740559|gb|KFA79481.1|/9.69101e-39/hypothetical protein S40288_05348 [Stachybotrys chartarum IBT 40288]	gi|615438666|ref|XM_007590860.1|/2e-21/Colletotrichum fioriniae PJ7 beta-ketoacyl synthase domain-containing protein mRNA	sp|Q9Y8A5|LNKS_ASPTE/1e-12/Lovastatin nonaketide synthase OS=Aspergillus terreus GN=lovB PE=1 SV=1	bfu:BC1G_09042/2e-18/similar to polyketide synthase; K15419 emericellamide biosynthesis, highly reducing iterative type I polyketide synthase	ML1229/7e-15/---	PF00109/7.0E-20/Beta-ketoacyl synthase, N-terminal domain	biological_process:GO:0055114//oxidation-reduction process;GO:0019748//secondary metabolic process;molecular_function:GO:0031177//phosphopantetheine binding;GO:0016740//transferase activity;GO:0016491//oxidoreductase activity;
Unigene20733_All	0.51	0	gi|751746293|gb|KIM94485.1|/3.33075e-39/hypothetical protein OIDMADRAFT_172777 [Oidiodendron maius Zn]	NA	NA	pcs:Pc21g12450/2e-13/Pc21g12450; K15417 zearalenone synthase, nonreducing iterative type I polyketide synthase	NA	NA	biological_process:GO:0008152//metabolic process;molecular_function:GO:0003824//catalytic activity;
Unigene15154_All	0.37	0	gi|751746294|gb|KIM94486.1|/6.82597e-29/hypothetical protein OIDMADRAFT_106798 [Oidiodendron maius Zn]	NA	NA	pcs:Pc21g12440/4e-18/Pc21g12440; K15418 zearalenone synthase, highly reducing iterative type I polyketide synthase	ML2355/3e-08/---	PTHR11712/5.4E-21/--	biological_process:GO:0055114//oxidation-reduction process;molecular_function:GO:0031177//phosphopantetheine binding;GO:0008270//zinc ion binding;GO:0016740//transferase activity;GO:0016491//oxidoreductase activity;
Unigene10324_All	0.35	0.34	gi|751746294|gb|KIM94486.1|/2.7513e-30/hypothetical protein OIDMADRAFT_106798 [Oidiodendron maius Zn]	NA	sp|Q0C8M3|LNKS_ASPTN/1e-13/Lovastatin nonaketide synthase OS=Aspergillus terreus (strain NIH 2624 / FGSC A1156) GN=lovB PE=3 SV=2	pcs:Pc21g12440/1e-25/Pc21g12440; K15418 zearalenone synthase, highly reducing iterative type I polyketide synthase	ML2355/2e-16/---	PTHR11712/3.8E-30/--	biological_process:GO:0055114//oxidation-reduction process;molecular_function:GO:0031177//phosphopantetheine binding;GO:0008270//zinc ion binding;GO:0016740//transferase activity;GO:0016491//oxidoreductase activity;
Unigene19194_All	0.34	0.33	gi|751746294|gb|KIM94486.1|/2.67672e-20/hypothetical protein OIDMADRAFT_106798 [Oidiodendron maius Zn]	NA	NA	pcs:Pc21g12440/2e-10/Pc21g12440; K15418 zearalenone synthase, highly reducing iterative type I polyketide synthase	NA	NA	NA
Unigene20781_All	0.34	0.32	gi|615438667|ref|XP_007590922.1|/2.85952e-14/beta-ketoacyl synthase domain-containing protein [Colletotrichum fioriniae PJ7] &gt;gi|588905677|gb|EXF85385.1| beta-ketoacyl synthase domain-containing protein [Colletotrichum fioriniae PJ7]	NA	sp|Q0C8M3|LNKS_ASPTN/7e-06/Lovastatin nonaketide synthase OS=Aspergillus terreus (strain NIH 2624 / FGSC A1156) GN=lovB PE=3 SV=2	pcs:Pc21g12440/7e-06/Pc21g12440; K15418 zearalenone synthase, highly reducing iterative type I polyketide synthase	NA	PTHR11712/2.2E-14/--	biological_process:GO:0055114//oxidation-reduction process;molecular_function:GO:0031177//phosphopantetheine binding;GO:0016740//transferase activity;GO:0016491//oxidoreductase activity;
Unigene17095_All	0.31	0	gi|367046729|ref|XP_003653744.1|/2.55526e-23/polyketide synthase [Thielavia terrestris NRRL 8126] &gt;gi|347001007|gb|AEO67408.1| polyketide synthase [Thielavia terrestris NRRL 8126]	NA	NA	pcs:Pc21g12440/5e-09/Pc21g12440; K15418 zearalenone synthase, highly reducing iterative type I polyketide synthase	NA	PS50075/12.474/Acyl carrier protein phosphopantetheine domain profile.	biological_process:GO:0055114//oxidation-reduction process;molecular_function:GO:0031177//phosphopantetheine binding;GO:0016740//transferase activity;GO:0016491//oxidoreductase activity;
Unigene20024_All	0.29	0	gi|667723524|gb|KFA65628.1|/9.90037e-20/hypothetical protein S40285_05353 [Stachybotrys chlorohalonata IBT 40285]	NA	NA	pcs:Pc21g12440/5e-07/Pc21g12440; K15418 zearalenone synthase, highly reducing iterative type I polyketide synthase	SMc02273/6e-09/---	PTHR11712/1.8E-29/--	NA
CL2915.Contig3_All	0.17	0	gi|242826754|ref|XP_002488696.1|/8.98237e-145/polyketide synthase, putative [Talaromyces stipitatus ATCC 10500] &gt;gi|218712088|gb|EED11515.1| polyketide synthase, putative [Talaromyces stipitatus ATCC 10500]	gi|953398245|ref|XM_014687879.1|/6e-09/Metarhizium brunneum ARSEF 3297 Beta-ketoacyl synthase partial mRNA	sp|Q9Y8A5|LNKS_ASPTE/9e-76/Lovastatin nonaketide synthase OS=Aspergillus terreus GN=lovB PE=1 SV=1	pcs:Pc21g12440/2e-81/Pc21g12440; K15418 zearalenone synthase, highly reducing iterative type I polyketide synthase	CAC3355/6e-78/---	PF00109/4.0E-80/Beta-ketoacyl synthase, N-terminal domain	biological_process:GO:0055114//oxidation-reduction process;molecular_function:GO:0050637//lovastatin nonaketide synthase activity;GO:0031177//phosphopantetheine binding;GO:0016491//oxidoreductase activity;
